# Supplementary material for: Preparation of fluorescent graphene quantum dots from humic acid for bioimaging application
Source: Royal Society of Chemistry journal article supplement (doi:10.1039/c5nj00760g), 2015-01-01
Supplement: c5nj00760g1.pdf [file c5nj00760g1.pdf]

**New Journal of Chemistry**  
**Electronic Supporting Information for**  
**Preparation of fluorescent graphene quantum dots from humic acid**  
**for bioimaging application**

Weijie Shi,<sup>a,b</sup> Hai Fan,<sup>a</sup> Shiyun Ai<sup>a\*</sup> and Lusheng Zhu<sup>b\*</sup>

*a. College of Chemistry and Material Science, Shandong Agricultural University, Taian, 271018, Shandong, PR China*

*b. College of Resources and Environment, Shandong Agricultural University, Taian, 271018, Shandong, PR China*

\* Corresponding author:

Tel: +86 538 8247660

Fax: +86 538 8242251

E-mail address: ashy@sdau.edu.cn (S.Y. Ai),

lushzhu@sdau.edu.cn(L.S. Zhu)

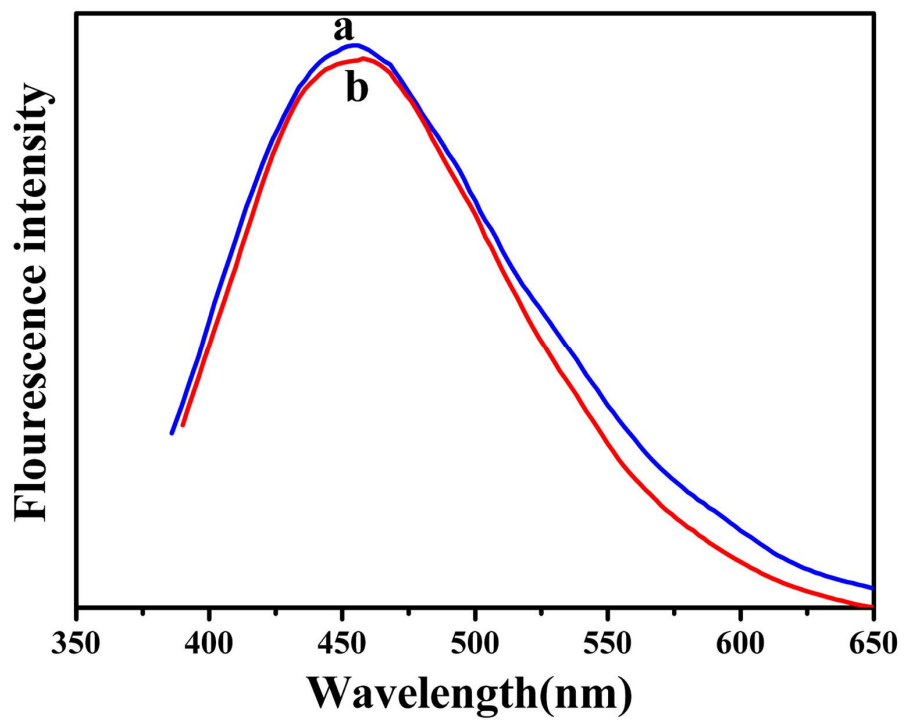

Fig. S1 PL emission spectra of the GQDs at fresh (a) and after six months of storage at 4°C (b).

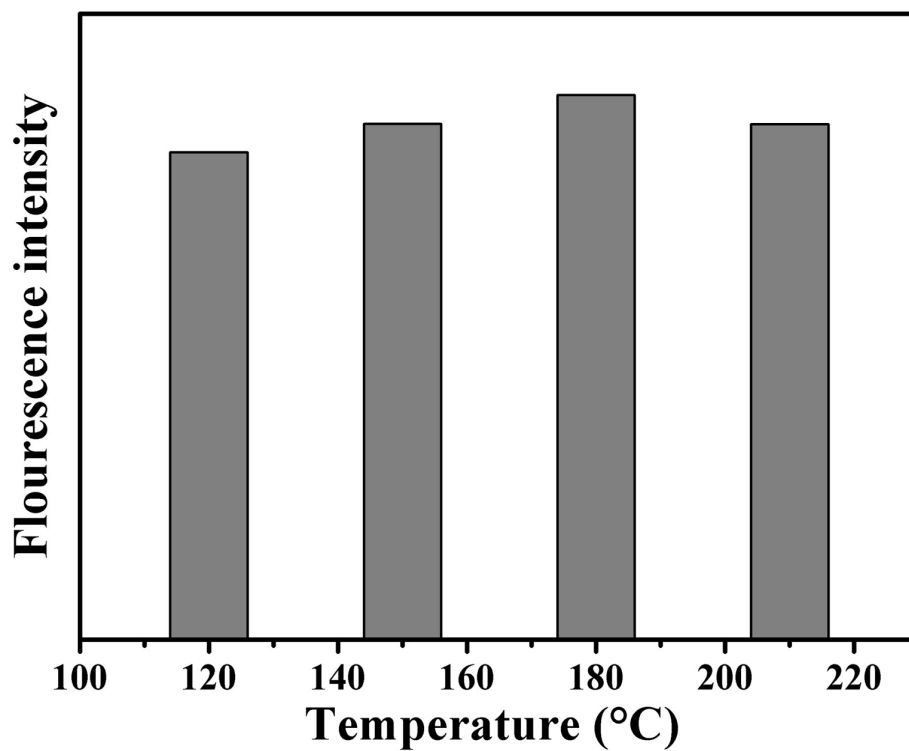

Fig. S2 Fluorescence intensity of the GQDs prepared at different reaction temperature.

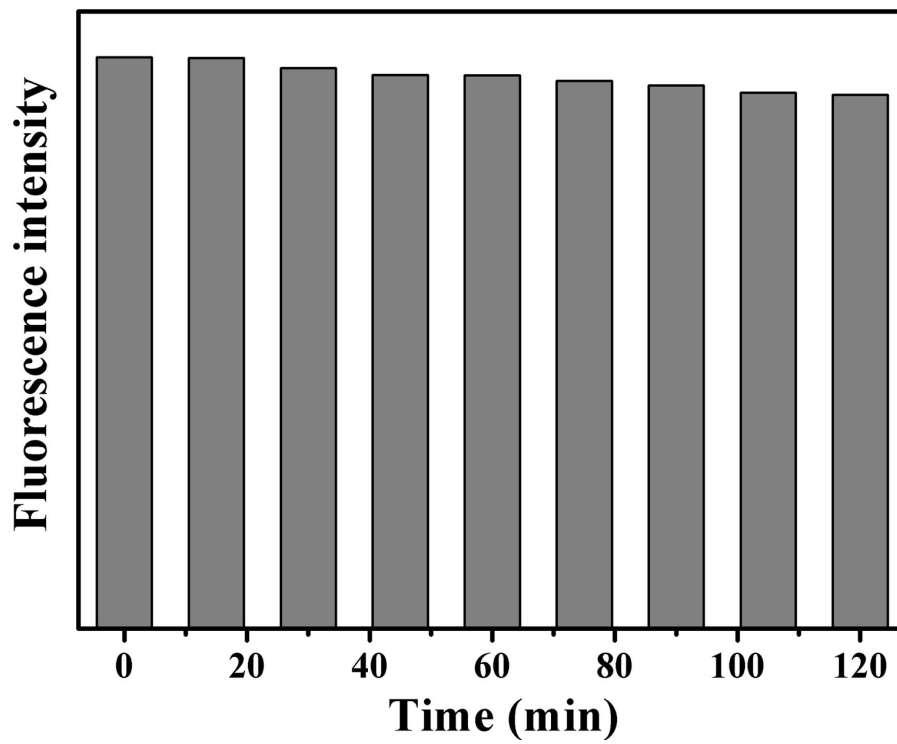

**Fig. S3** Effect of different exposure time under UV lights on the fluorescence intensity of the GQDs.
